# Supplementary material
Source: PubMed Central journal article supplement (PMC4933205)
Supplement: NIHMS68987-supplement-Suppl__Inf_.pdf [file NIHMS68987-supplement-Suppl__Inf_.pdf]

## Supporting Information

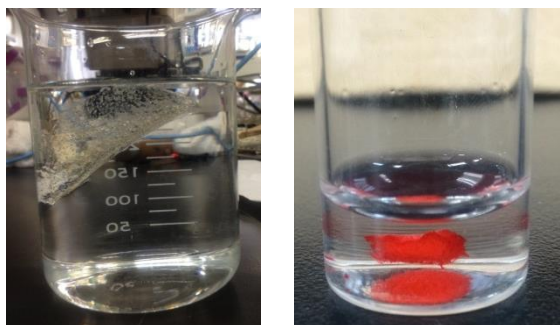

**Figure S1.** Left: exemplary appearance of chitosan hydrogels (CT-TA) following incubation in distilled water after network formation. Hydrogels are transparent and do not change colour over time. Right: hydrogel CT-PhS following AR loading. The sample (CT-PhS) has turned red due to the full incorporation of AR in the material.
